# Supplementary material
Source: PubMed Central journal article supplement (PMC7831869)
Supplement: mmc1.pdf [file mmc1.pdf]

# THE LANCET

## Supplementary appendix

This appendix formed part of the original submission. We post it as supplied by the authors.

Supplement to: Crovetto F, Crispi F, Llurba E, Figueras F, Gómez-Roig MD, Gratacós E. Seroprevalence and presentation of SARS-CoV-2 in pregnancy. *Lancet* 2020; published online August 6. [http://dx.doi.org/10.1016/S0140-6736\(20\)31714-1](http://dx.doi.org/10.1016/S0140-6736(20)31714-1).

## 1 **Appendix**

**Table.** Baseline characteristics and clinical features of pregnant women positive for SARS-CoV-2 infection (N=125) in the first vs. third trimester.

| Characteristics                                       | First Trimester | Third Trimester | p     |
|-------------------------------------------------------|-----------------|-----------------|-------|
|                                                       | N=54            | N=71            |       |
| Age (years)                                           | 33.7 (5.1)      | 31.8 (6.1)      | 0.062 |
| White ethnicity                                       | 31 (57)         | 43 (61)         | 0.697 |
| Body mass index (Kg/m <sup>2</sup> )                  | 24.1 (6.2)      | 23.9 (4.3)      | 0.209 |
| Smoking status                                        | 4 (7)           | 6 (9)           | 0.543 |
| Medical history                                       |                 |                 |       |
| Chronic hypertension                                  | 1 (2)           | 2 (3)           | 0.602 |
| Diabetes mellitus                                     | 1 (2)           | 0 (0)           | 0.432 |
| Autoimmune disease                                    | 2 (4)           | 0 (0)           | 0.185 |
| Respiratory disease                                   | 2 (4)           | 3 (4)           | 0.297 |
| Nulliparous                                           | 34 (63)         | 36 (51)         | 0.095 |
| Multiple pregnancy                                    | 2 (4)           | 1 (1)           | 0.398 |
| Symptoms compatible with COVID-19 within last 2months |                 |                 |       |
| None                                                  | 38 (70)         | 37 (52)         | 0.012 |
| Fever                                                 | 7 (13)          | 16 (23)         | 0.152 |
| Dry cough                                             | 5 (9)           | 17 (24)         | 0.034 |
| Dyspnea                                               | 0 (0)           | 8 (11)          | 0.010 |
| Tiredness                                             | 5 (9)           | 4 (6)           | 0.307 |
| Sore throat                                           | 6 (11)          | 3 (4)           | 0.116 |
| Rash on skin, or discoloration of fingers/toes        | 0 (0)           | 0 (0)           | NA    |
| Diarrhea                                              | 4 (7)           | 5 (7)           | 0.575 |
| Loss of taste or smell                                | 7 (13)          | 16 (23)         | 0.152 |
| At least 3 symptoms or anosmia                        | 9 (17)          | 22 (31)         | 0.065 |
| Fever, cough and dyspnea                              | 0 (0)           | 8 (11)          | 0.010 |
| Hospital admission for COVID-19 symptoms              | 0 (0)           | 7 (10)          | 0.019 |

SARS-CoV-2: severe acute respiratory syndrome coronavirus 2

Data are expressed as n (%) or mean (SD)

3 **Figure.** Clinical spectrum of SARS-CoV-2 infection in pregnant women in the first and third trimester.  
4

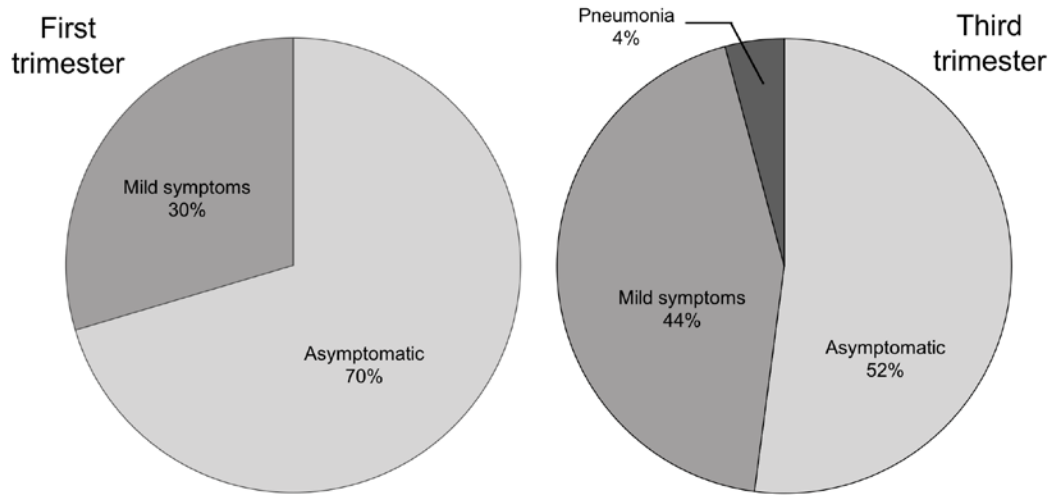

5  
6
